# Supplementary material for: Simple multi-level microchannel fabrication by pseudo-grayscale backside diffused light lithography
Source: Royal Society of Chemistry journal article supplement (doi:10.1039/c3ra43834a), 2013-01-01
Supplement: c3ra43834a.pdf [file c3ra43834a.pdf]

Electronic Supplementary Information

## Simple Multi-level Microchannel Fabrication by Pseudo-Grayscale Backside Diffused Light Lithography

David Lai,<sup>a,b</sup> Joseph M. Labuz,<sup>a</sup> Jiwon Kim,<sup>b,c</sup> Gary D. Luker,<sup>a,d,e</sup> Ariella Shikanov,<sup>a,b,c</sup> and Shuichi Takayama<sup>a,b,c,f\*</sup>

<sup>a</sup> Department of Biomedical Engineering, University of Michigan, Ann Arbor, MI, USA

<sup>b</sup> Reproductive Sciences Program, University of Michigan, Ann Arbor, MI, USA

<sup>c</sup> Department of Macromolecular Science and Engineering, University of Michigan, Ann Arbor, MI, USA

<sup>d</sup> Department of Radiology, University of Michigan, Ann Arbor, MI, USA

<sup>e</sup> Department of Microbiology and Immunology, University of Michigan, Ann Arbor, MI, USA

<sup>f</sup> Division of Nano-Bio and Chemical Engineering WCU Project, UNIST, Ulsan, Republic of Korea; E-mail: takayama@umich.edu

\* To whom correspondence should be addressed.

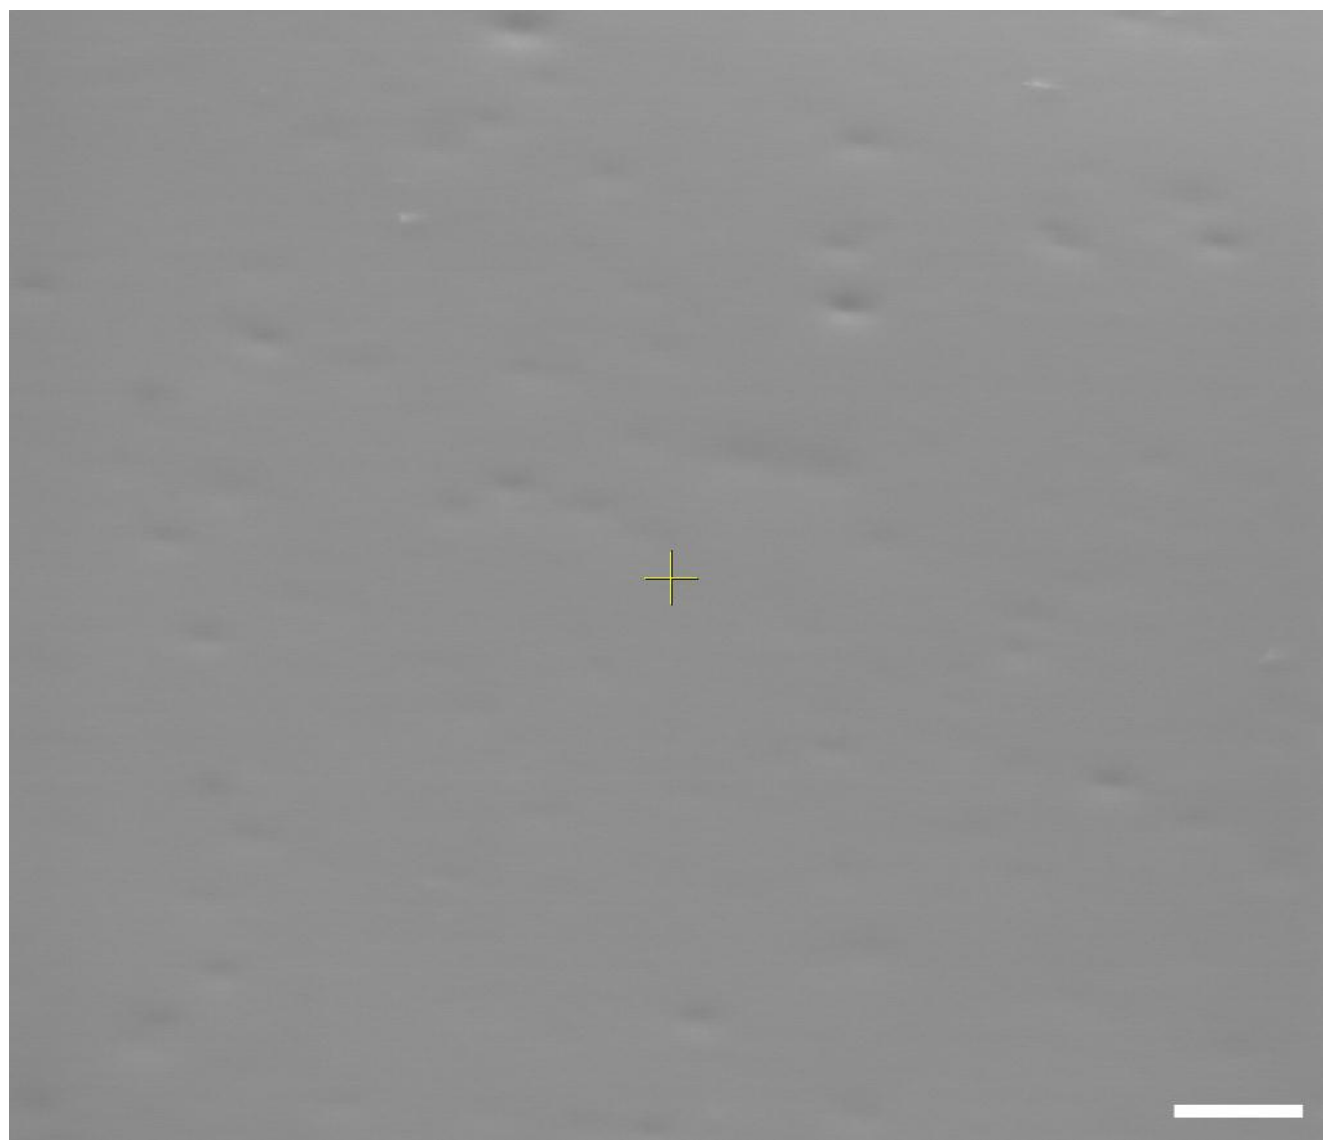

Fig. S1 SEM image of a 24  $\mu\text{m}$  tall channel using unspun SU-8 at 8.16% transparent and 225s of UV exposure. Scale Bar: 20  $\mu\text{m}$
